# Supplementary material
Source: PubMed Central journal article supplement (PMC1356572)

**A**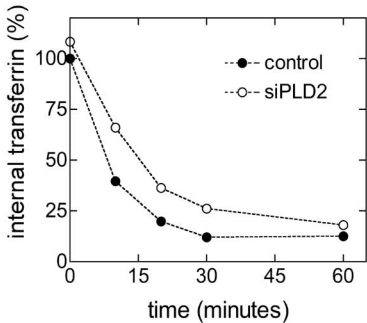**B**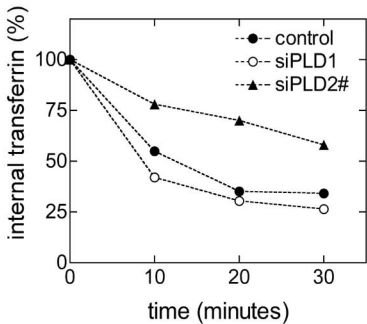

Supplement: mbc_E05-05-0389_1.pdf [file mbc_E05-05-0389_1.pdf]

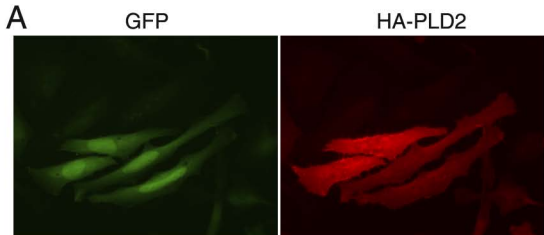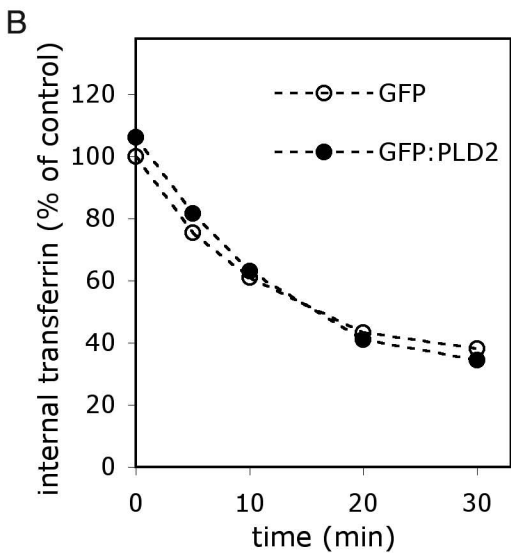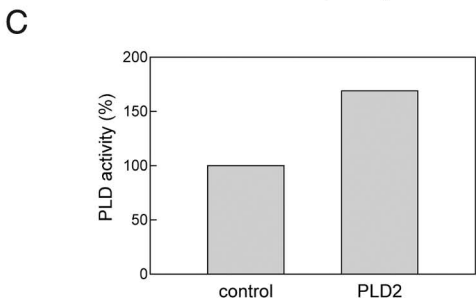

Supplement: mbc_E05-05-0389_2.pdf [file mbc_E05-05-0389_2.pdf]

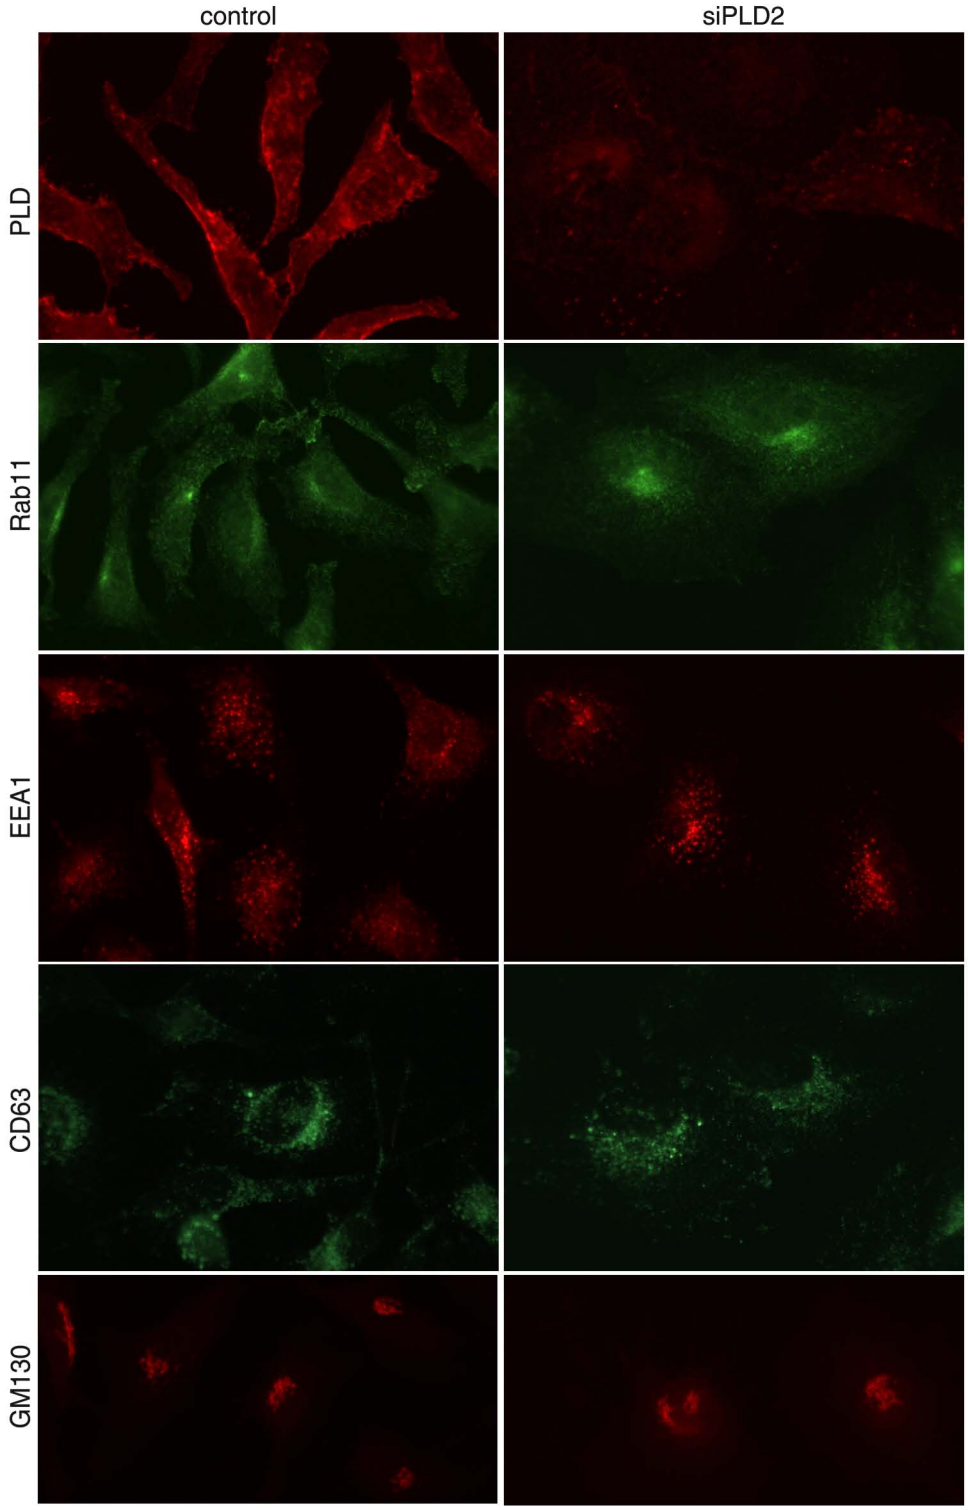

Supplement: mbc_E05-05-0389_3.pdf [file mbc_E05-05-0389_3.pdf]
